# Supplementary material for: Performance Evaluation of Machine Learning Algorithms for Sarcopenia Diagnosis in Older Adults
Source: MDPI journal article supplement (doi:10.3390/healthcare11192699), 2023-10-09
Supplement: s1 [file s1]

## Supplementary Materials

**Supplementary Table S1.** SARC-F Screen for Sarcopenia ([https://www.physio-pedia.com/SARC-F:\\_A\\_Simple\\_Questionnaire\\_to\\_Rapidly\\_Diagnose\\_Sarcopenia](https://www.physio-pedia.com/SARC-F:_A_Simple_Questionnaire_to_Rapidly_Diagnose_Sarcopenia)).

|                                                                                                                  |                                                                                                                        |
|------------------------------------------------------------------------------------------------------------------|------------------------------------------------------------------------------------------------------------------------|
| <b>SARC-F Screen for Sarcopenia: Component Question Scoring</b>                                                  |                                                                                                                        |
| *Strength: How much difficulty do you have in lifting and carrying 10 pounds?                                    | <ul style="list-style-type: none"> <li>• None 0</li> <li>• Some 1</li> <li>• A lot or unable 2</li> </ul>              |
| *Assistance in walking: How much difficulty do you have walking across a room?                                   | <ul style="list-style-type: none"> <li>• None 0</li> <li>• Some 1</li> <li>• A lot, use aids, or unable 2</li> </ul>   |
| *Rise from a chair: How much difficulty do you have transferring from a chair or bed?                            | <ul style="list-style-type: none"> <li>• None 0</li> <li>• Some 1</li> <li>• A lot or unable without help 2</li> </ul> |
| *Climb stairs: How much difficulty do you have climbing a flight of 10 stairs?                                   | <ul style="list-style-type: none"> <li>• None 0</li> <li>• Some 1</li> <li>• A lot or unable 2</li> </ul>              |
| *Falls: How many times have you fallen in the past year?                                                         | <ul style="list-style-type: none"> <li>• None 0</li> <li>• less than 3 falls 1</li> <li>• 4 or more falls 2</li> </ul> |
| Data suggests that a SARC-F score of $\geq 4$ best predicts the need for further, more comprehensive evaluation. |                                                                                                                        |

**Supplementary Table S2.** Hyperparameters of the Machine Learning Models.

| For ALL Models    |         |                   |               |                  |           |
|-------------------|---------|-------------------|---------------|------------------|-----------|
| Parameters        | Values  | Parameters        | Values        | Parameters       | Values    |
| Algorithm name    | XGBoost | Algorithm name    | Random Forest | Algorithm name   | Light GBM |
| eta               | 0.05    | criterion         | gini          | min data in leaf | 3         |
| gamma             | 0.001   | max_features      | 11            | max depth        | 5         |
| max_depth         | 6       | min_samples_leaf  | 30            | num leaves       | 62        |
| max_leaves        | 2       | min_samples_split | 10            | num iterations   | 1000      |
| reg_alpha         | 0.8333  | ntrees            | 1000          | learning rate    | 0.1       |
| reg_lambda        | 0.9149  |                   |               | bagging fraction | 0.8       |
| subsample         | 0.5     |                   |               |                  |           |
|                   |         |                   |               |                  |           |
| For Female Models |         |                   |               |                  |           |
| Parameters        | Values  | Parameters        | Values        | Parameters       | Values    |
| Algorithm name    | SVM     | Algorithm name    | Random Forest | Algorithm name   | kNN       |
| C                 | 1.206   | criterion         | gini          | metric           | cityblock |
| kernel            | rbf     | max_features      | 11            | n_neighbors      | 2         |
|                   |         | min_samples_leaf  | 30            | weights          | distance  |
|                   |         | min_samples_split | 10            |                  |           |
|                   |         | ntrees            | 1000          |                  |           |
|                   |         |                   |               |                  |           |

**Supplementary Table S3. Average compute time (minutes).**

|                                            | <b>Time (minutes)</b> |
|--------------------------------------------|-----------------------|
| <b>XGBoost-ALL model</b>                   | 14.04                 |
| <b>Random Forest-ALL model</b>             | 15.57                 |
| <b>LightGBM-ALL model</b>                  | 13.18                 |
| <b>Support Vector Machine-Female Model</b> | 15.20                 |
| <b>Random Forest-Female model</b>          | 14.33                 |
| <b>K Nearest Neighbors-Female Model</b>    | 13.49                 |

**Supplementary Table S4. Results of the Training Set**

| <b>ALL Model*</b>                       | <b>LightGBM</b> | <b>RF</b> | <b>XGBoost</b> |
|-----------------------------------------|-----------------|-----------|----------------|
| <b>Accuracy</b>                         | 0.939           | 0.907     | 0.878          |
| <b>AUC</b>                              | 0.984           | 0.949     | 0.941          |
| <b>F1 score</b>                         | 0.934           | 0.882     | 0.869          |
| <b>Matthews Correlation Coefficient</b> | 0.687           | 0.555     | 0.551          |
| <b>Precision</b>                        | 0.943           | 0.906     | 0.880          |
| <b>Recall</b>                           | 0.937           | 0.914     | 0.887          |
| <b>Female Model*</b>                    | <b>SVM</b>      | <b>RF</b> | <b>KNN</b>     |
| <b>Accuracy</b>                         | 0.954           | 0.938     | 0.931          |
| <b>AUC</b>                              | 0.995           | 0.972     | 0.966          |
| <b>F1 score</b>                         | 0.930           | 0.946     | 0.943          |
| <b>Matthews Correlation Coefficient</b> | 0.691           | 0.799     | 0.711          |
| <b>Precision</b>                        | 0.949           | 0.968     | 0.935          |
| <b>Recall</b>                           | 0.943           | 0.971     | 0.873          |

\* Results of the Training Set
